# Supplementary material for: Identification of Markers Associated with Wheat Dwarf Virus (WDV) Tolerance/Resistance in Barley (Hordeum vulgare ssp. vulgare) Using Genome-Wide Association Studies
Source: MDPI journal article supplement (doi:10.3390/v15071568), 2023-07-18
Supplement: s1 [file s1]

(a)

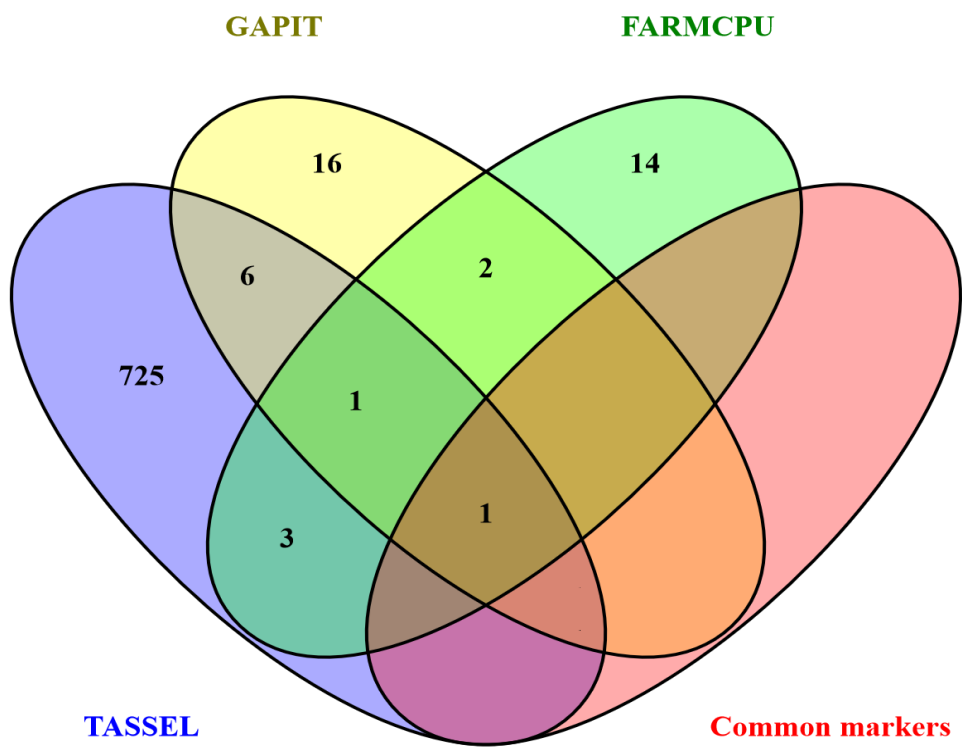

(b)

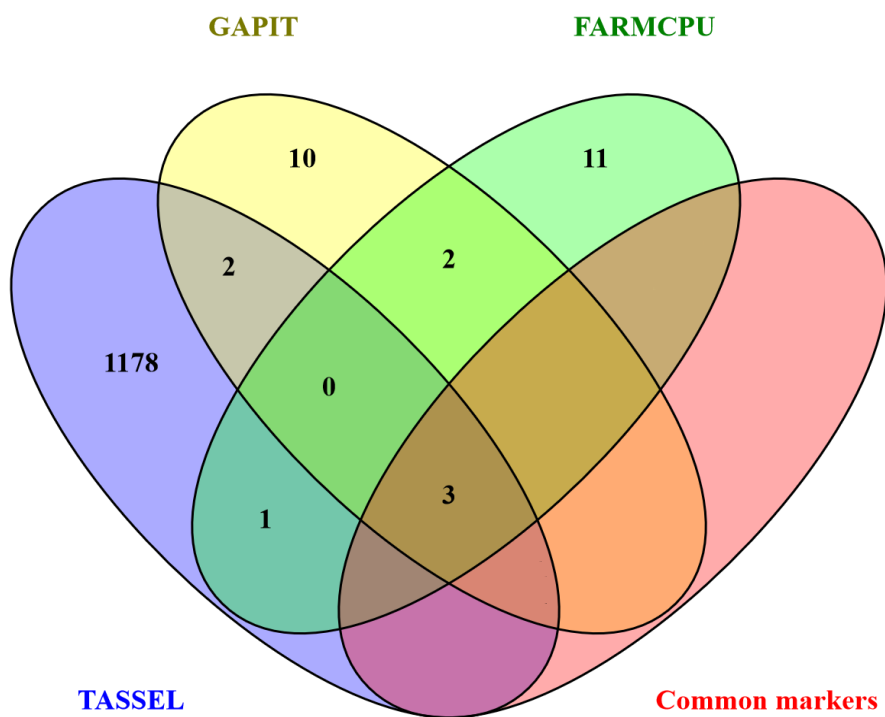

(c)

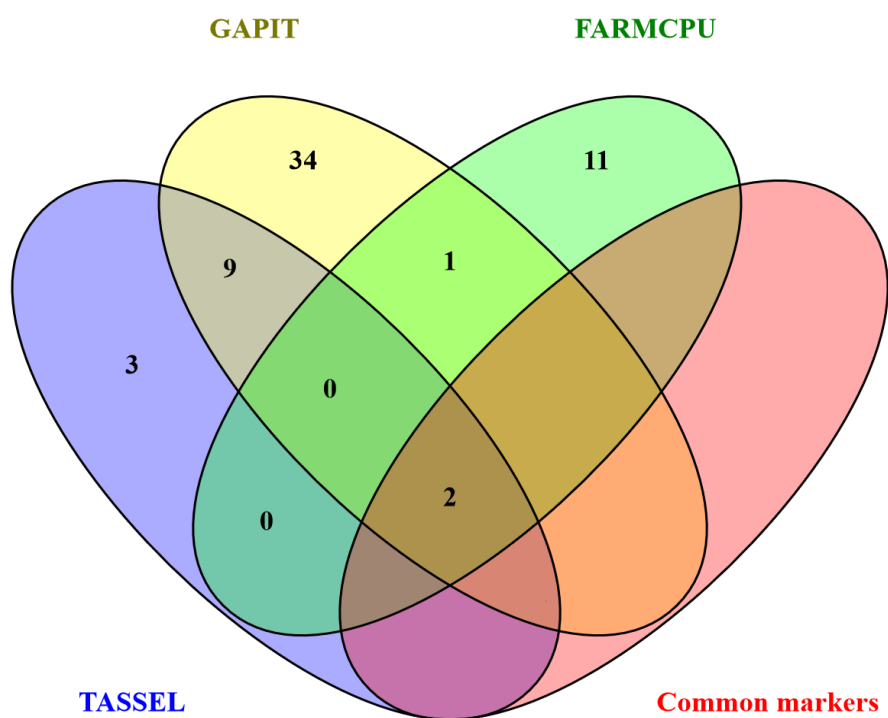

(d)

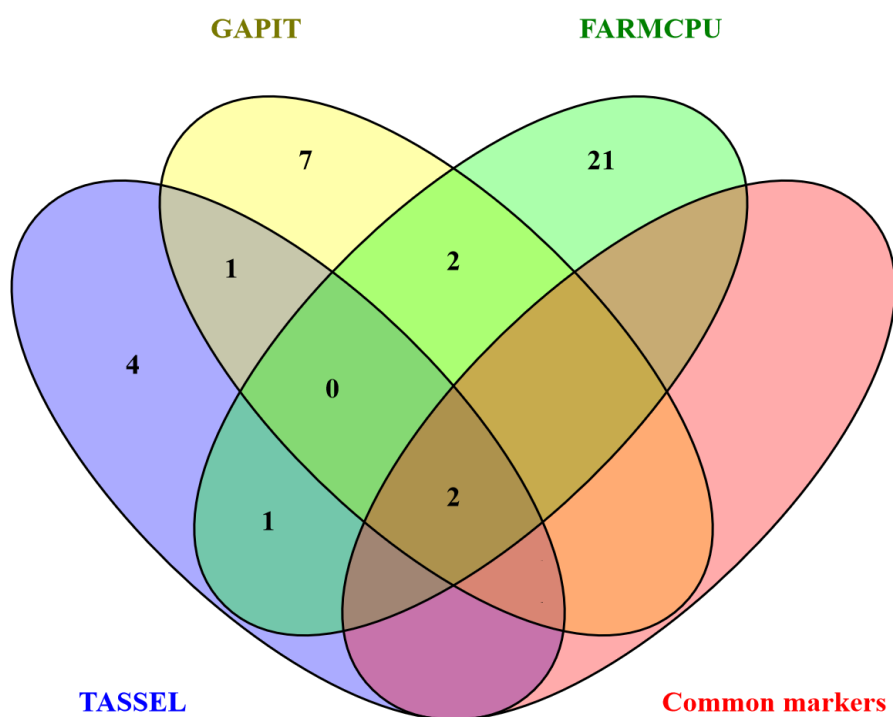

(e)

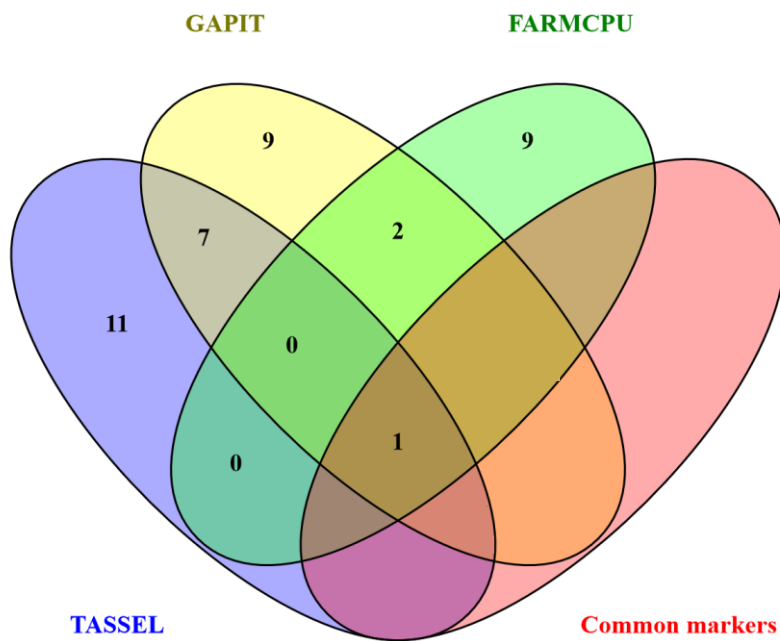

**Figure S2:** venn plot indicates number of identified markers ( $LOD \geq 3$ ) with different methods for (a) relative virus titer, (b) relative total grain weight (c) relative plant height, (d) relative number of ears per plant, (e) relative thousand grain weight.
