# Supplementary material for: Identification of Markers Associated with Wheat Dwarf Virus (WDV) Tolerance/Resistance in Barley (Hordeum vulgare ssp. vulgare) Using Genome-Wide Association Studies
Source: MDPI journal article supplement (doi:10.3390/v15071568), 2023-07-18
Supplement: s1 [file s1]

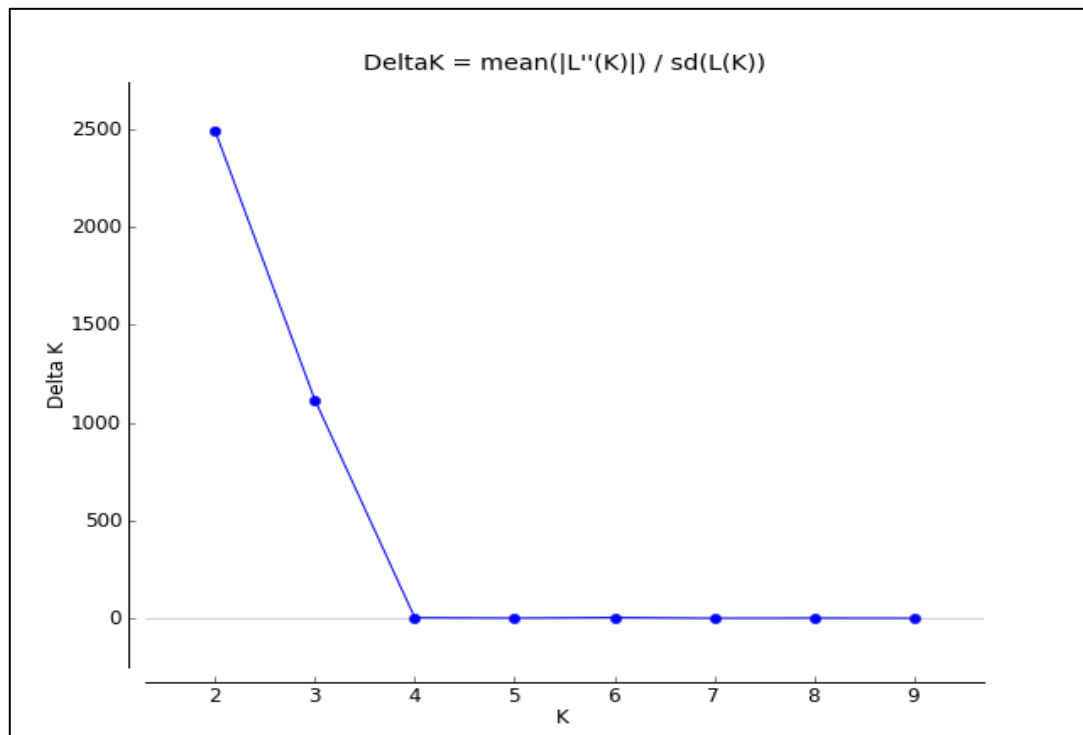

**Figure S1:** DeltaK plot: Number of optimal detected clusters (K= 3) according Bayesian clustering approach.
